# Supplementary material
Source: Springer Nature journal article supplement (https://www.springermedizin.de/resource/supplementary/13046_2012_573_MOESM2_ESM.pdf/9662480)

**A**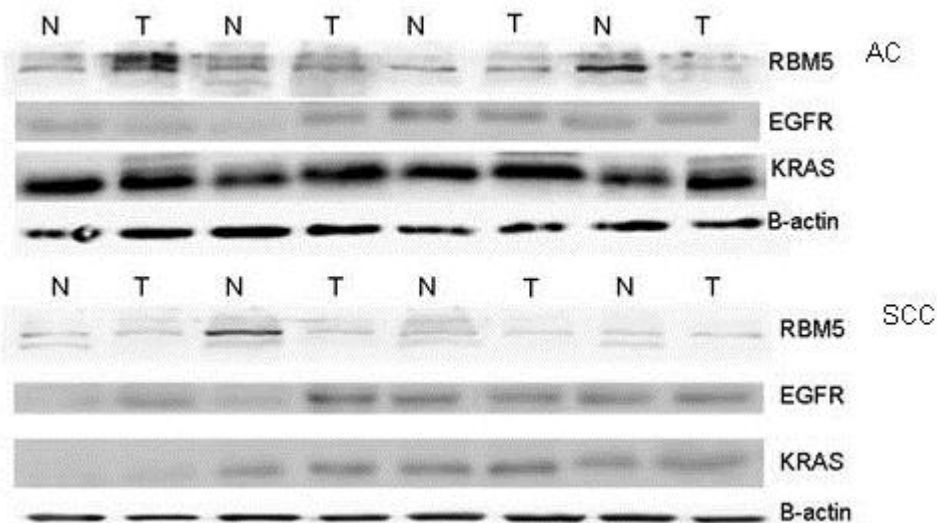**B**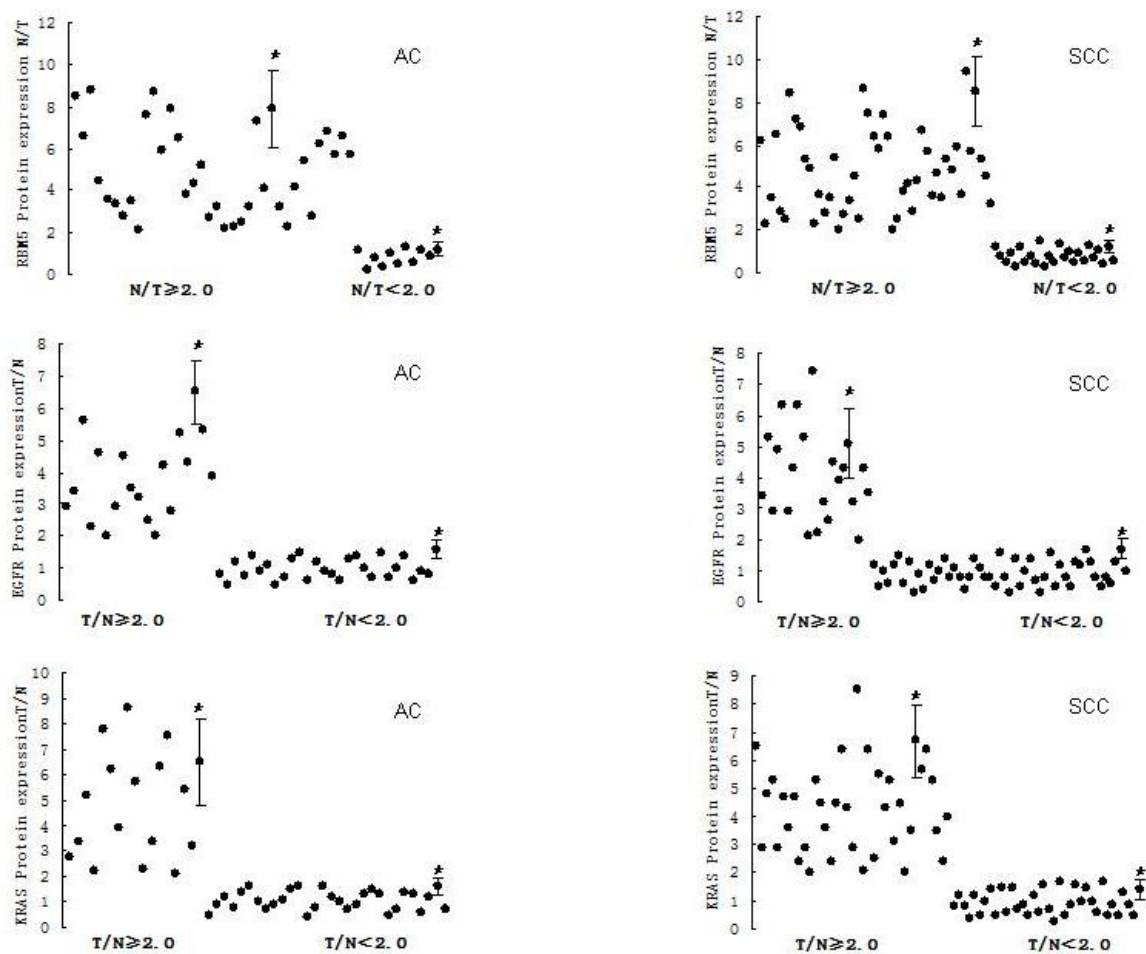

Supplement: MOESM2 [file 9662480]
